# Supplementary material for: The first example of “turn-off” red fluorescence photoswitching for the representatives of nitrile-rich negative photochromes
Source: Royal Society of Chemistry journal article supplement (doi:10.1039/d0nj00718h), 2020-01-01
Supplement: d0nj00718h1.pdf [file d0nj00718h1.pdf]

*Electronic Supplementary Information for*

**The first example of “turn-off” red fluorescence photoswitching for the  
representatives of nitrile-rich negative photochromes**

Mikhail Yu. Belikov, Mikhail Yu. Ievlev,\* Sergey V. Fedoseev, Oleg V. Ershov

Ulyanov Chuvash State University, Moskovskiy pr. 15, Cheboksary, Russia.

\*E-mail: [hiliam@bk.ru](mailto:hiliam@bk.ru)

**Contents**

|                                                      |     |
|------------------------------------------------------|-----|
| 1. Experimental .....                                | S-2 |
| 1.1 General remarks .....                            | S-2 |
| 1.2. Synthetic procedures and spectral data .....    | S-2 |
| 2. Absorption and Emission spectra .....             | S-4 |
| 3. NMR <sup>1</sup> H, <sup>13</sup> C spectra ..... | S-7 |

## 1. Experimental

### 1.1 General remarks

The progress of reactions and the purity of products were monitored by TLC on Sorbfil plates (spots were visualized under UV light, by treatment with iodine vapor, or by heating). The IR spectra were recorded on an FSM-2201 spectrometer with Fourier transform from samples dispersed in mineral oil. The NMR spectra were measured in DMSO-*d*<sub>6</sub> on Bruker DRX-500 spectrometer using tetramethylsilane as an internal reference. Elemental analyses were performed using a FlashEA 1112 CHN analyzer. The mass spectra were obtained on a gas chromatograph mass spectrometer Shimadzu GCMS-QP2010S. The UV spectra were recorded on an Agilent Cary 60 UV-Vis Spectrophotometer (10<sup>-5</sup> M). To study the photochromic behavior of compounds, the solutions were irradiated with non-filtered visible light by LED XM-LT6 CREE (spectral range of 400-700 nm, a luminous power density equal to 205 mW/cm<sup>2</sup>). Melting points were determined on an OptiMelt MPA100 device.

### 1.2 Synthetic procedures and spectral data

*General synthesis procedure of nitro-substituted (E)-2-(3-cyano-4-(2-hydroxystyryl)-5,5-dimethylfuran-2(5H)-ylidene)malononitriles 1a-c.* To a suspension of 0.199 g (1 mmol) of TCF acceptor in 2-3 mL of 96% ethanol an appropriate nitrosubstituted 2-hydroxybenzaldehyde and 0.077 g (1 mmol) of dry ammonium acetate were added in an argon atmosphere. The resulting mixture was stirred at 35-40 °C for 2-4 h (TCL controlled). Then 0.5 mL of 5% aqueous HCl was added and the stirring was continued for additional 2 h at room temperature. The resulting mixture was then cooled to 5-10 °C, the precipitated solid was filtered off and washed by 1 mL of water:ethanol (1:1) and 1 mL of cold ethanol (0-5 °C). Dried in a vacuum desiccator over CaCl<sub>2</sub> to constant weight.

*(E)-2-(3-Cyano-4-(2-hydroxy-5-nitrostyryl)-5,5-dimethylfuran-2(5H)-ylidene)malononitrile 1a.* The physical and spectral data are consistent with the literature [1].

*(E)*-2-(3-Cyano-4-(2-hydroxy-3-nitrostyryl)-5,5-dimethylfuran-2(5H)-ylidene)malononitrile **1b**. Mp 267–268 °C (dec.). <sup>1</sup>H NMR (500.13 MHz, DMSO-d<sub>6</sub>): δ 1.78 (6H, s, 2CH<sub>3</sub>), 7.18 (1H, t, *J* = 8.0 Hz, C<sub>6</sub>H<sub>3</sub>), 7.42 (1H, d, *J* = 16.6 Hz, CH=), 8.14 (1H, dd, *J* = 1.4, 8.3 Hz, C<sub>6</sub>H<sub>3</sub>), 8.24 (1H, d, *J* = 16.6 Hz, CH=), 8.34 (1H, dd, *J* = 1.4, 7.8 Hz, C<sub>6</sub>H<sub>3</sub>), 11.00-11.50 (1H, br. s, OH). <sup>13</sup>C NMR (125.67 MHz, DMSO-d<sub>6</sub>): δ 24.73, 54.78, 99.32, 99.42, 110.95, 111.65, 112.51, 117.37, 119.93, 125.77, 128.33, 135.50, 137.07, 139.79, 151.60, 174.90, 177.14. MS, (EI, 70 eV): *m/z* (%) 348 [M]<sup>+</sup> (26), 333 [M-Me]<sup>+</sup> (12). IR (mineral oil, cm<sup>-1</sup>): 3240 (OH), 2234, 2216 (CN), 1585 (C=C). Anal. Calcd for C<sub>18</sub>H<sub>12</sub>N<sub>4</sub>O<sub>4</sub>: C, 62.07; H, 3.47; N, 16.09. Found: C, 61.93; H, 3.57; N, 15.92.

*(E)*-2-(3-Cyano-4-(2-hydroxy-3,5-dinitrostyryl)-5,5-dimethylfuran-2(5H)-ylidene)malononitrile **1c**. Mp 259–260 °C (dec.). <sup>1</sup>H NMR (500.13 MHz, DMSO-d<sub>6</sub>): δ 1.80 (6H, s, 2CH<sub>3</sub>), 7.87 (1H, d, *J* = 15.9 Hz, CH=), 8.23 (1H, d, *J* = 15.9 Hz, CH=), 8.54 (1H, d, *J* = 3.2, Hz, C<sub>6</sub>H<sub>3</sub>), 8.66 (1H, d, *J* = 3.2, Hz, C<sub>6</sub>H<sub>3</sub>), <sup>13</sup>C NMR (125.67 MHz, DMSO-d<sub>6</sub>): δ 25.54, 53.45, 97.77, 99.06, 111.11, 112.14, 112.96, 116.03, 124.44, 126.80, 130.78, 132.85, 139.52, 144.97, 165.92, 176.98, 177.13. MS, (EI, 70 eV): *m/z* (%) 393 [M]<sup>+</sup> (35), 378 [M-Me]<sup>+</sup> (19), 346 (5). IR (mineral oil, cm<sup>-1</sup>): 2235, 2218 (CN), 1581 (C=C). Anal. Calcd for C<sub>18</sub>H<sub>11</sub>N<sub>5</sub>O<sub>6</sub>: C, 54.97; H, 2.82; N, 17.81. Found: C, 54.82; H, 2.91; N, 17.64.

## 2. Absorption and Emission spectra

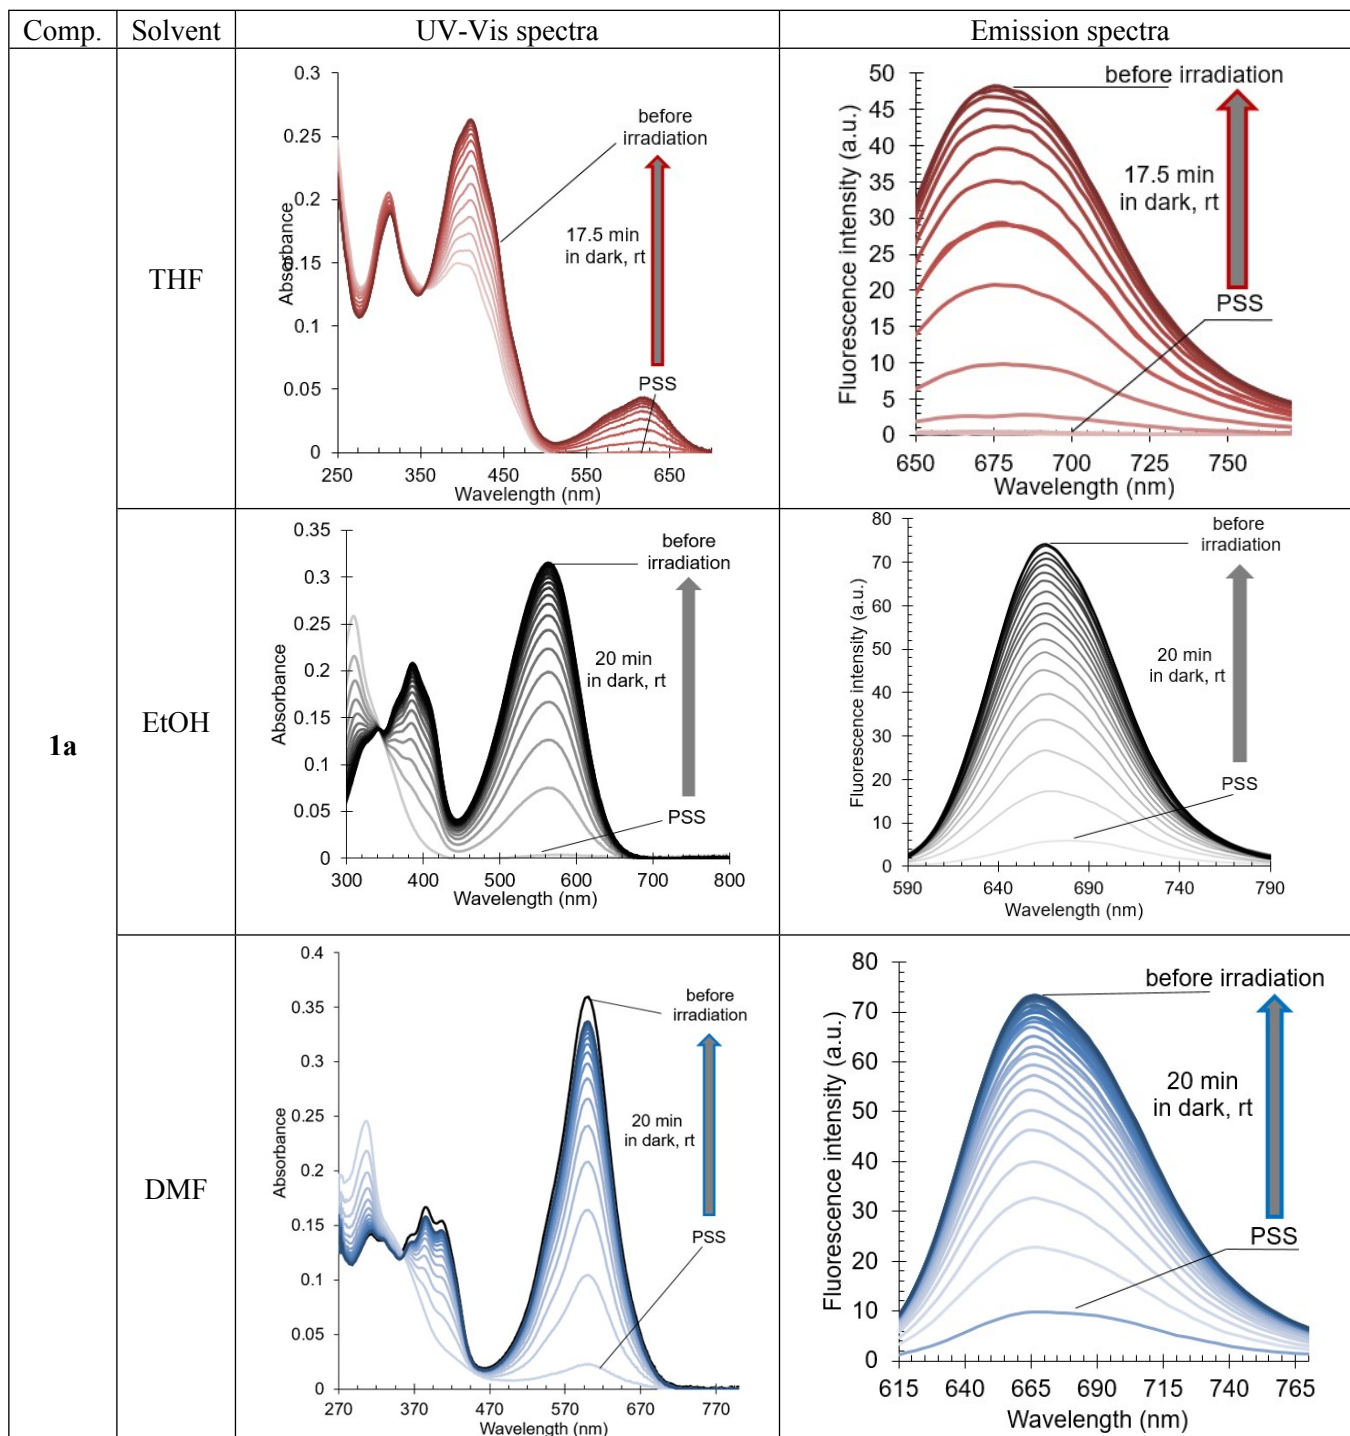

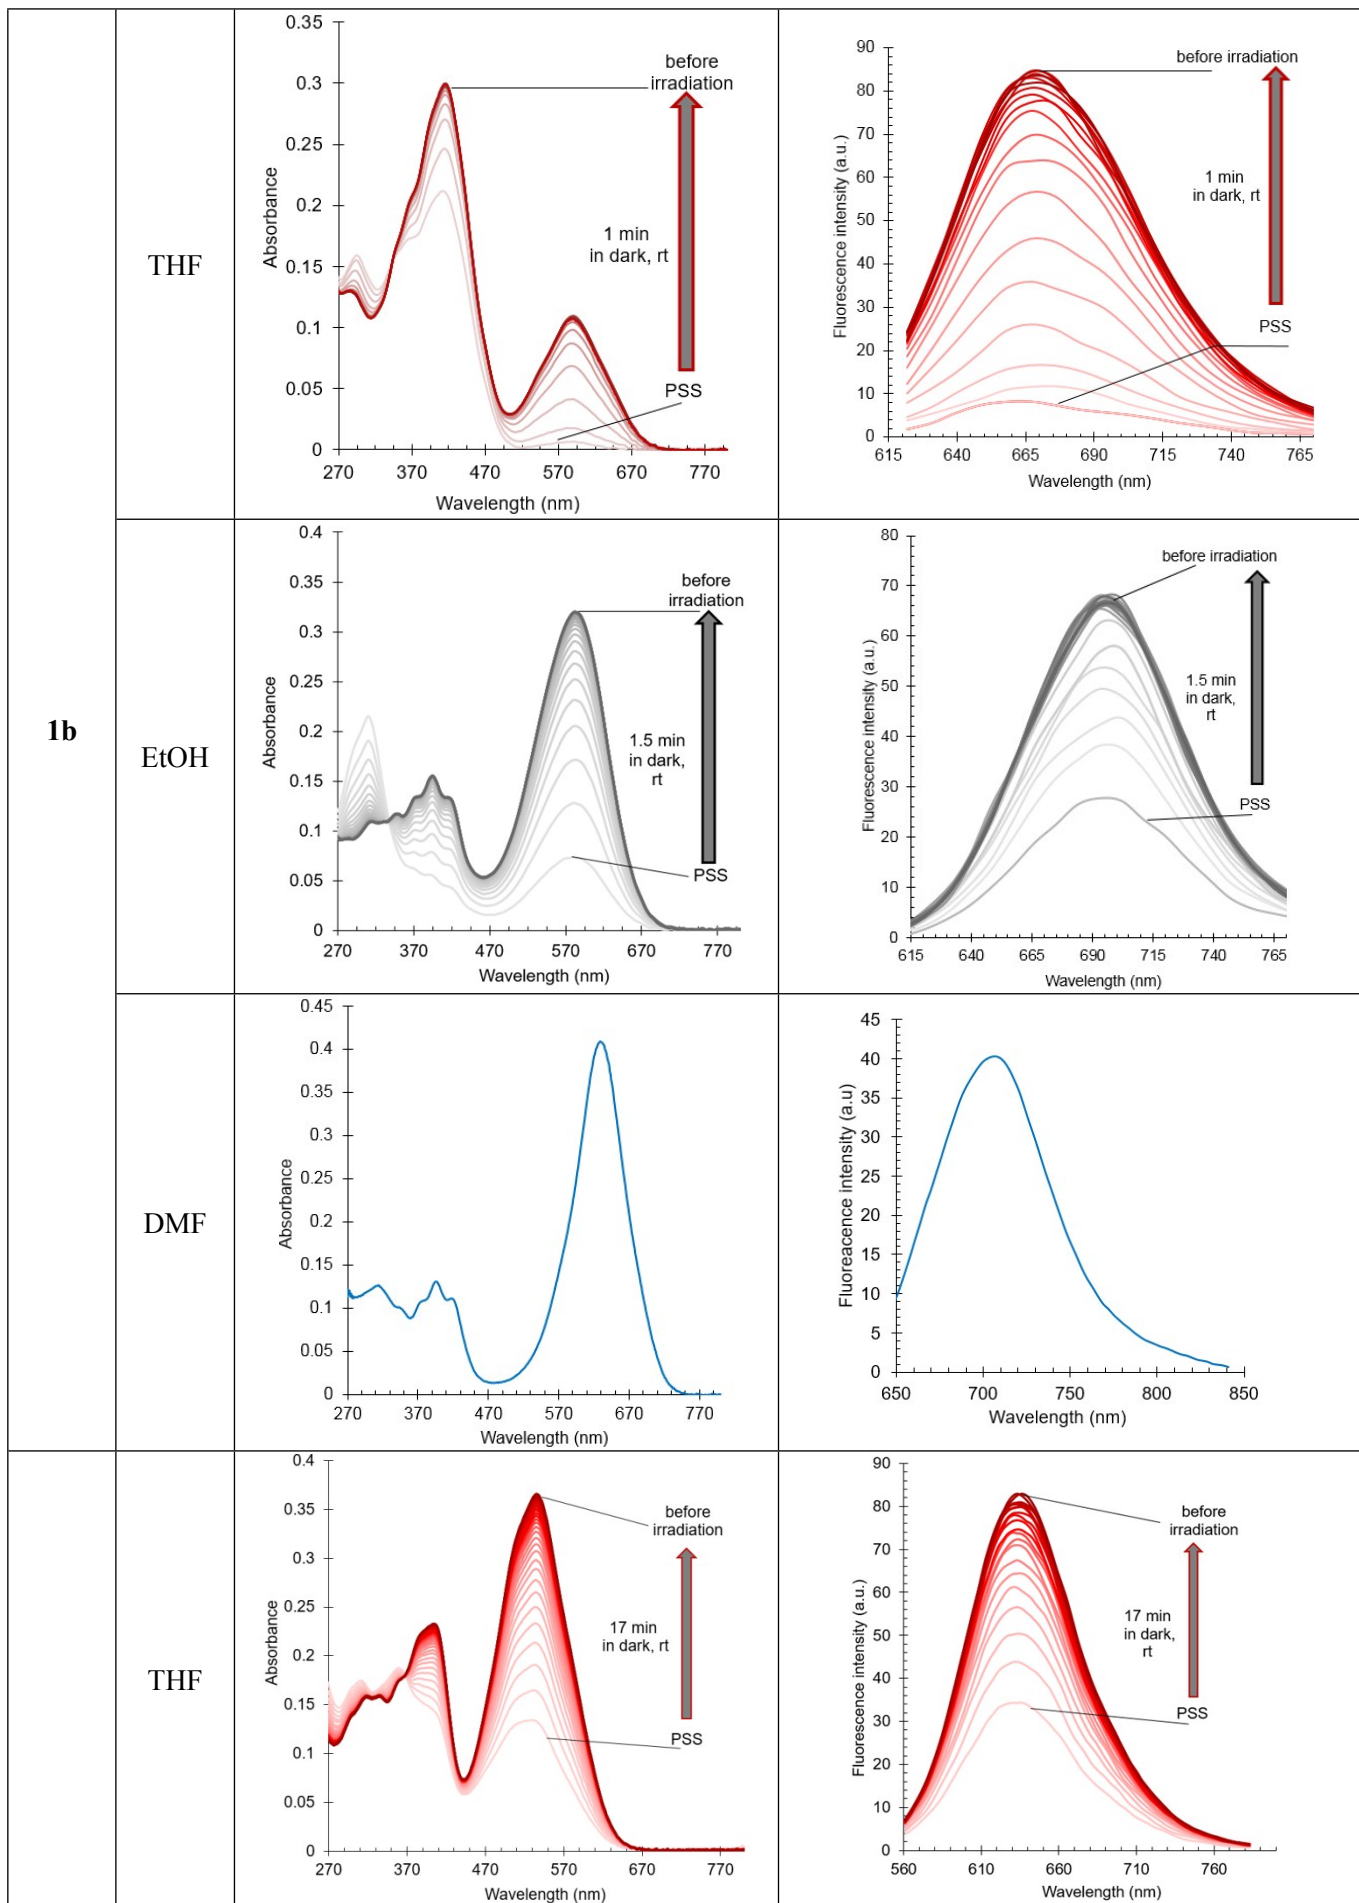

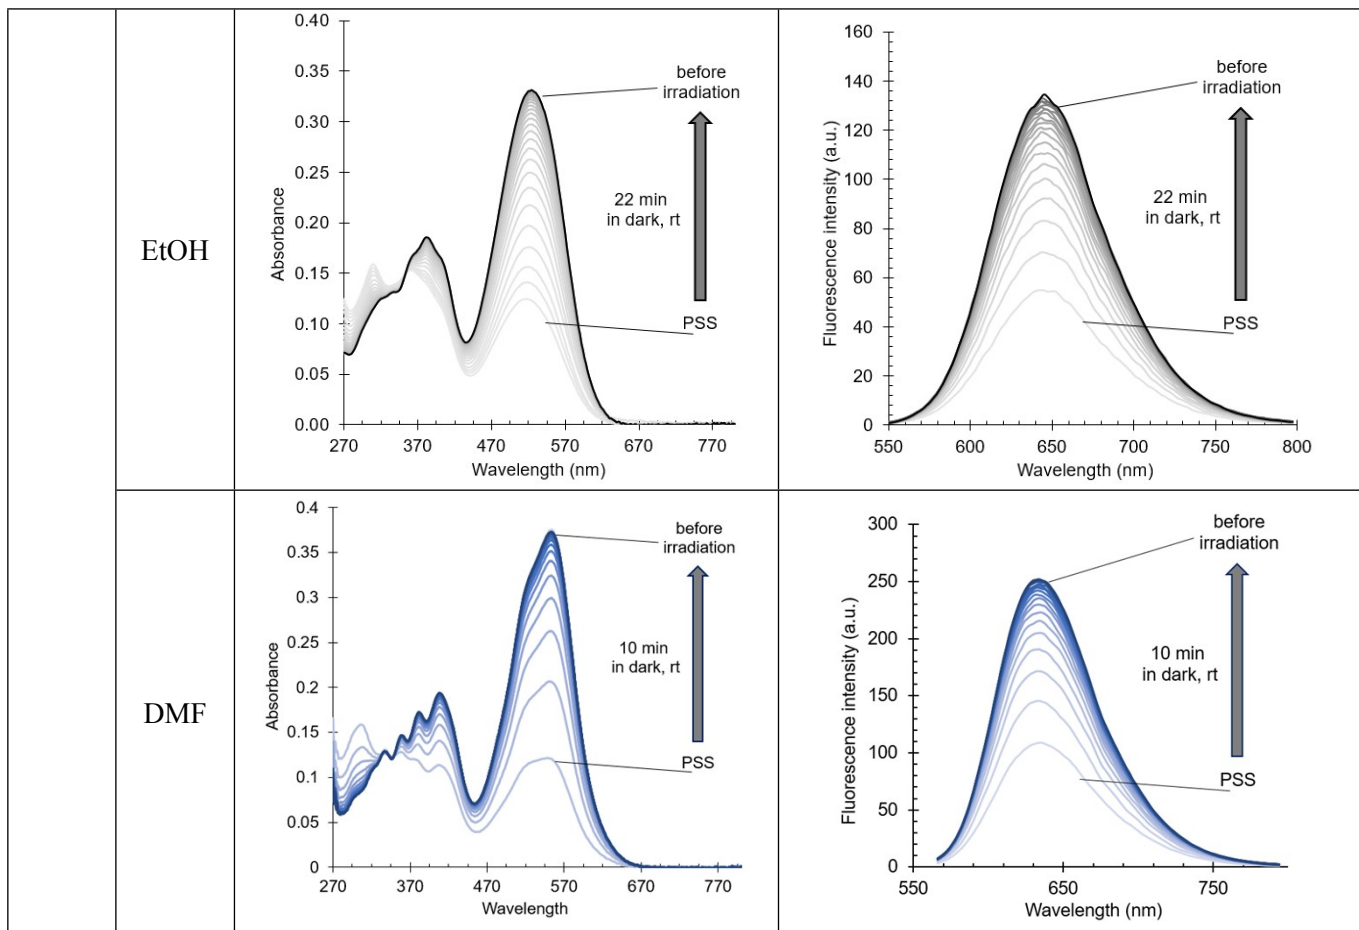

### 3. NMR $^1\text{H}$ , $^{13}\text{C}$ spectra

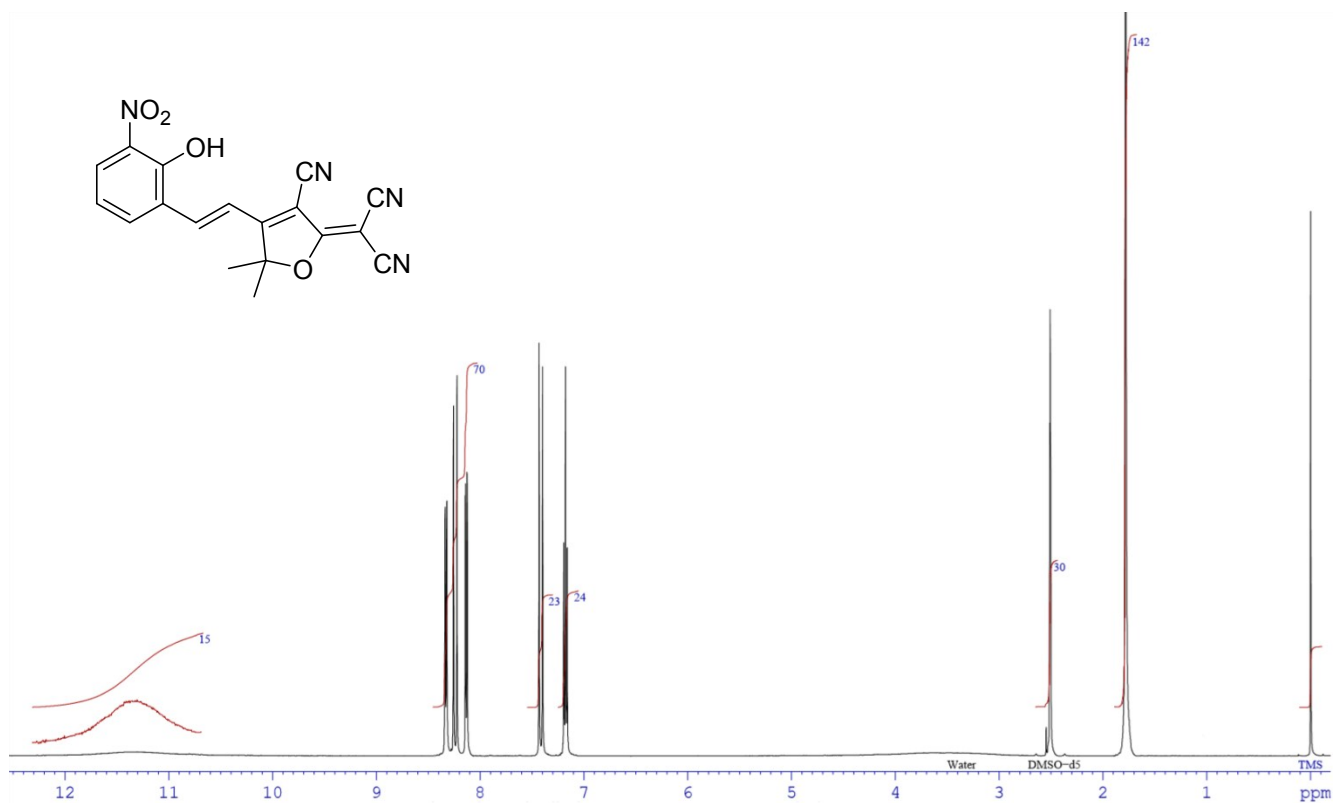

Fig. 1.  $^1\text{H}$ -NMR-spectrum of **1b** (500 MHz,  $\text{DMSO}-d_6$ , 293K)

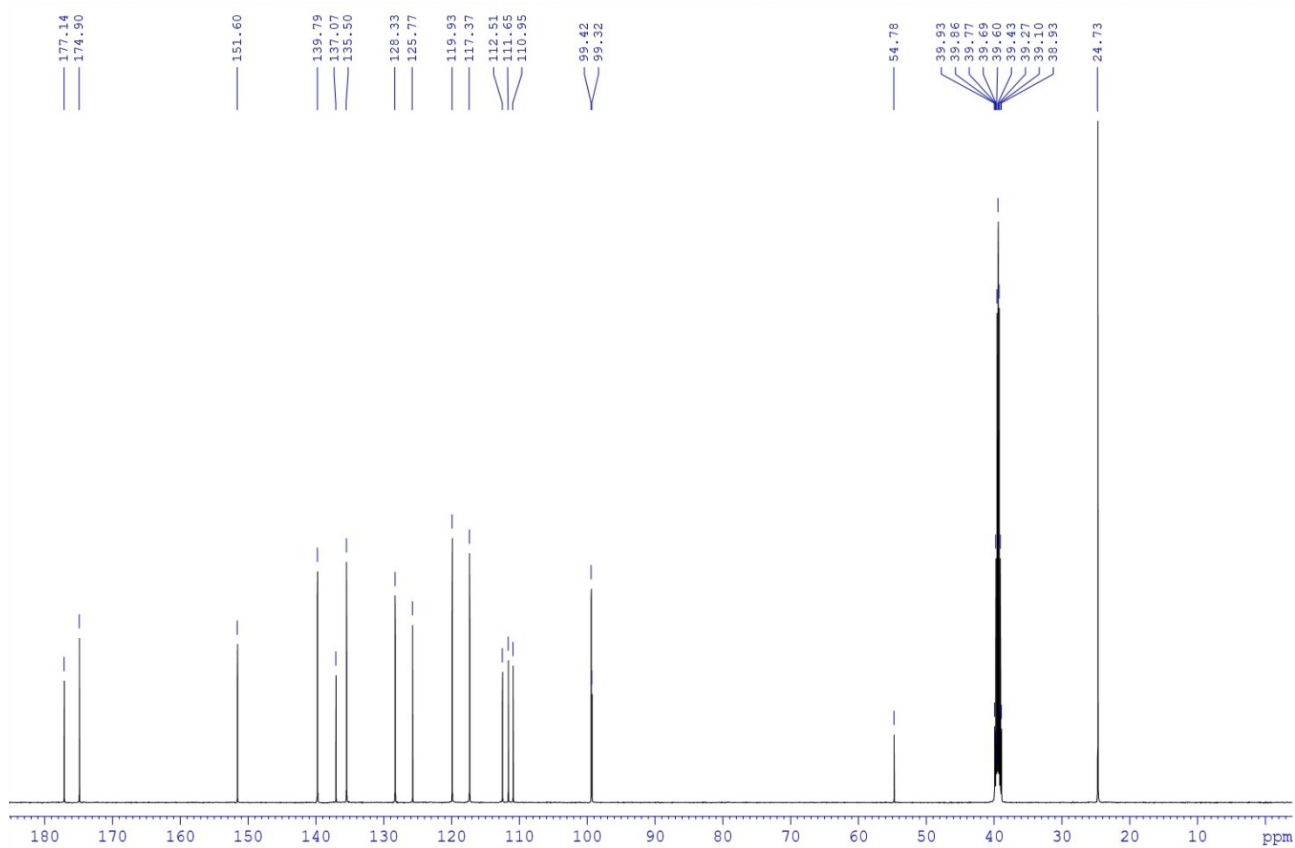

Fig. 2.  $^{13}\text{C}$ -NMR-spectrum of **1b** (126 MHz,  $\text{DMSO}-d_6$ , 296K)

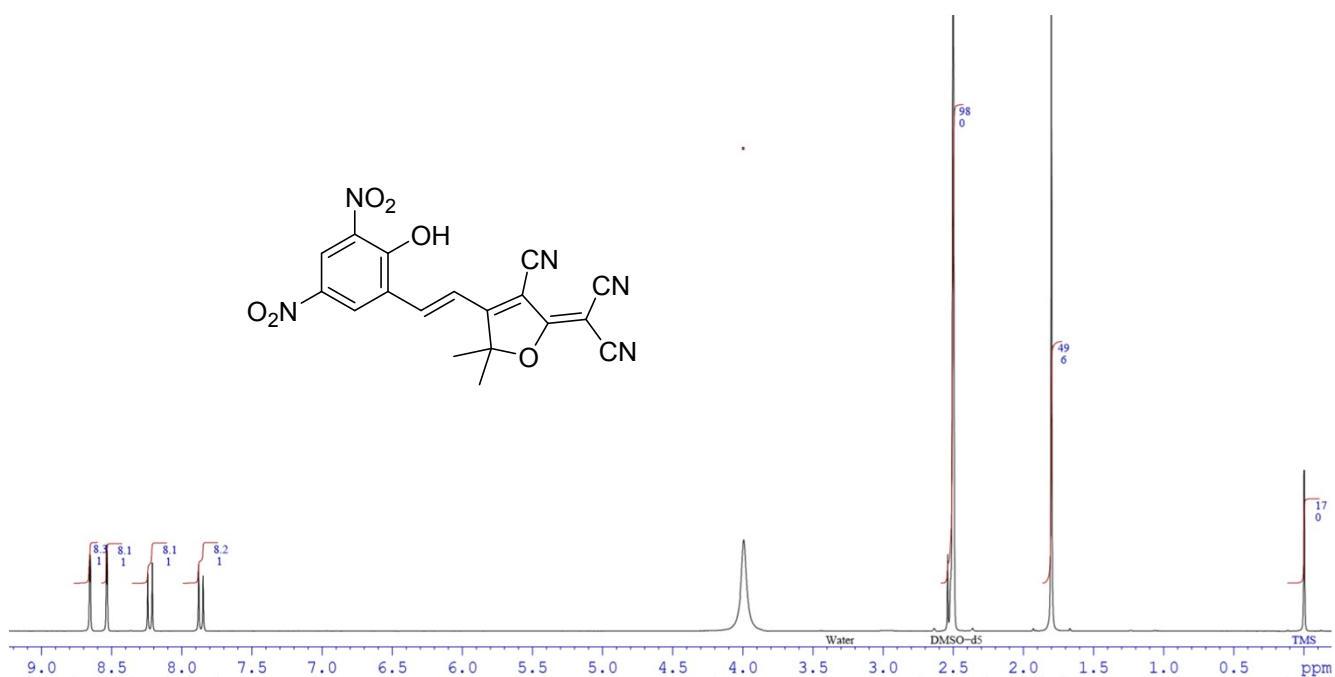

Fig. 3. <sup>1</sup>H-NMR-spectrum of **1c** (500 MHz, DMSO-*d*<sub>6</sub>, 300K)

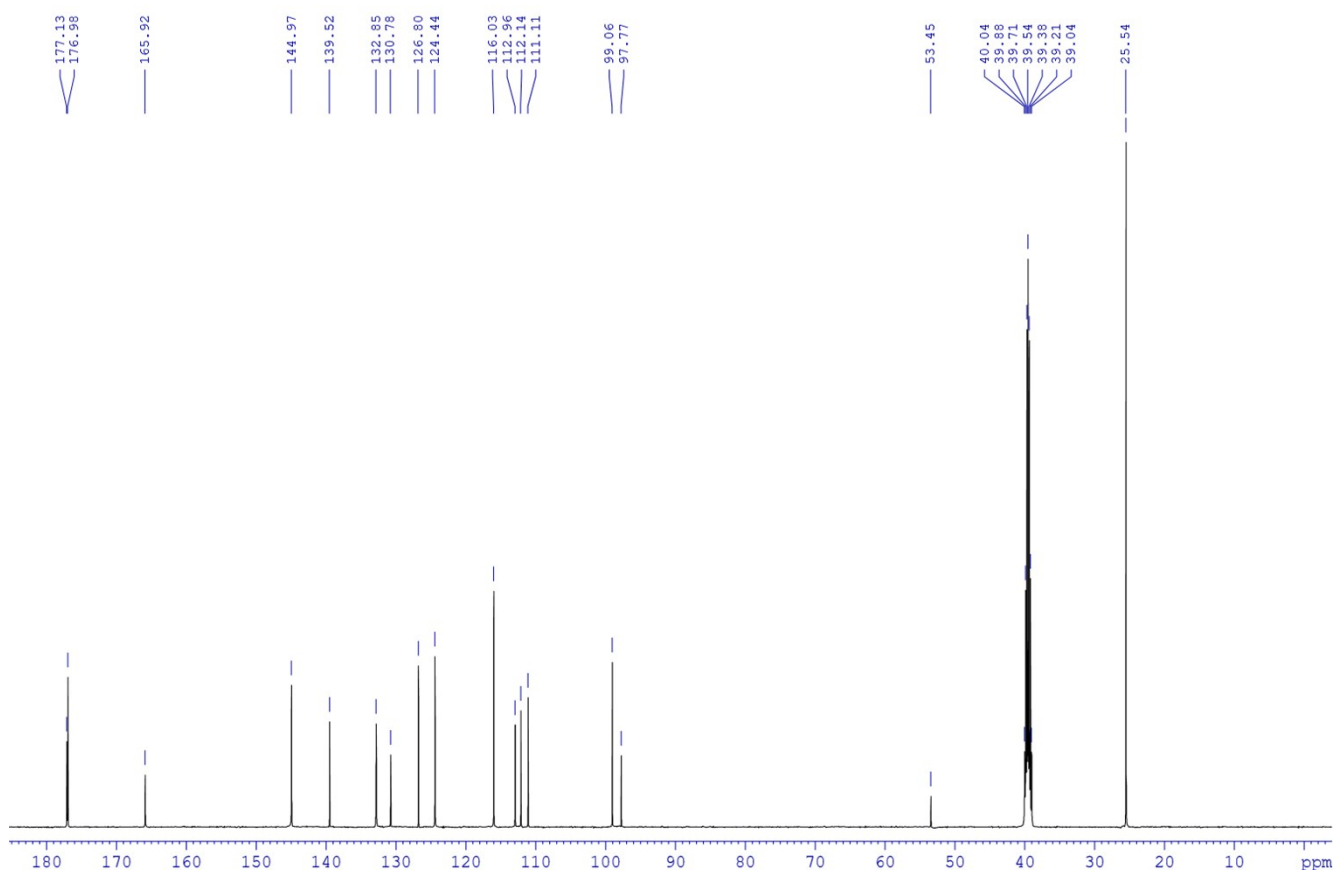

Fig. 4. <sup>13</sup>C-NMR-spectrum of **1c** (126 MHz, DMSO-*d*<sub>6</sub>, 300K)
